# Supplementary material for: Cosmc deficiency causes spontaneous autoimmunity by breaking B cell tolerance
Source: PubMed Central journal article supplement (PMC8494437; doi:10.1126/sciadv.abg9118), 2021-10-06

Supplementary Materials for

***Cosmc* deficiency causes spontaneous autoimmunity by breaking B cell tolerance**

Junwei Zeng\*, Rajindra P. Aryal, Kathrin Stavenhagen, Chi Luo, Renyan Liu, Xiaohui Wang,  
Jiaxuan Chen, Hao Li, Yasuyuki Matsumoto, Yingchun Wang, Jianmei Wang,  
Tongzhong Ju, Richard D. Cummings\*

\*Corresponding author. Email: [jzeng1@bidmc.harvard.edu](mailto:jzeng1@bidmc.harvard.edu) (J.Z.);  
[rcummin1@bidmc.harvard.edu](mailto:rcummin1@bidmc.harvard.edu) (R.D.C.)

Published 6 October 2021, *Sci. Adv.* **7**, eabg9118 (2021)  
DOI: [10.1126/sciadv.abg9118](https://doi.org/10.1126/sciadv.abg9118)

**This PDF file includes:**

Figs. S1 to S6

## Supplementary Figure Legends

### Fig. S1 BC-*Cosmc*KO mice demonstrated autoimmune disease-like pathological features.

(A) Representative images of ocular manifestations of female (11-20 months old) and male mice (13-18 months old) from both BC-*Cosmc*KO and WT littermate controls shown. (B) Examples of ocular histology of male BC-*Cosmc*KO and WT mice by hematoxylin and eosin (H&E) staining. Scale bar represents 500  $\mu\text{m}$ . (C) Summary of abnormal ocular manifestations in both male and female mice. (D) Wet weight of spleens of young female (left) at 2-4 months old, and aged male (right) at 13-18 months old. Each symbol (black square and open circle for WT and BC-*Cosmc*KO mice, respectively) represents an individual mouse, graphed as mean  $\pm$  1 standard error of the mean (SEM). Unpaired two-tailed Student's *t*-tests were performed to determine statistical significance with \*\*\* =  $p < 0.001$ , ns = not significant. (E) Steatosis of male mice from both BC-*Cosmc*KO and WT littermate controls at 13 to 18 months old. Liver sections were stained with H&E. Scale bar represents 100  $\mu\text{m}$ . Representative images from both WT and BC-*Cosmc*KO mice were shown. Photo Credit: Junwei Zeng, BIDMC.

### Fig. S2 Disrupted B cell tolerance in BC-*Cosmc*KO mice.

(A) Autoreactive antibodies of BC-*Cosmc*KO mice at 2 months old. Serum samples (1:90 dilution) from both BC-*Cosmc*KO and WT littermate controls were assayed by HEp-2 cell staining. Bound mouse IgM (red) detected by goat anti-mouse IgM conjugated with Alexa fluor-568, and bound IgG (green) detected by goat anti-mouse IgG conjugated with Alexa fluor-488. The WT-1 shown is the only one (1 out of 17) demonstrating minimal HEp-2 reactivity. Images were acquired at 63x magnification. Scale bar represents 20  $\mu\text{m}$ . (B) Summary of assayed samples from BC-*Cosmc*KO mice. (C) Immunoglobulin deposition in kidneys of female BC-*Cosmc*KO mice. Kidney images acquired at 20x magnification. Representative images from both WT (n=5) and BC-*Cosmc*KO male mice (n=6) shown. Scale bar represents 50  $\mu\text{m}$ . (D, E) Urine was collected from aged BC-*Cosmc*KO and WT mice of both genders for analysis by Chemstrips (D), and Bicinchoninic Acid (BCA) protein assay (E). WT (n=7) and BC-*Cosmc*KO mice (n=9) for male, WT (n=7) and BC-*Cosmc*KO mice (n=7) for female in D. WT (n=4) and BC-*Cosmc*KO mice (n=8) for male, WT (n=6) and BC-*Cosmc*KO mice (n=7) for female in E. The female urinary protein data (by BCA) are representative of two independent experiments with similar results, at least 6 animals in each group. (F, G) Histopathology scores of kidneys of both aged mice: WT (n=6) and BC-*Cosmc*KO mice (n=9) for male in F, and WT (n=8) and BC-*Cosmc*KO mice (n=12) for female in G. Representative images of H&E staining of kidneys of aged female shown and boxed area shown at x40 magnification in G (right). Scale

bars represent 100  $\mu\text{m}$  (left) and 20  $\mu\text{m}$  (right) respectively. The glomerular index is the score of the category (a), detailed in the Methods. (H) Blue native agarose polyacrylamide gel electrophoresis (BN-APAGE) analysis for IgM and IgG of both aged WT and BC-*Cosmc*KO mice sera. Four and three biological replicates of female and male respectively are shown. For D-G, each symbol (black square and open circle for WT and BC-*Cosmc*KO mice, respectively) represents an individual mouse, graphed as mean  $\pm$  1 standard error of the mean (SEM). Serum or tissues were collected from age-matched aged (11-20 months old) and young (2-4 months old) mice of indicated gender. Unpaired two-tailed Student's *t*-tests were performed to determine statistical significance with ns stands for non-significant, \* =  $p < 0.05$ , \*\* =  $p < 0.01$ .

### Fig. S3 Immune effectors in BC-*Cosmc*KO mice.

Blood samples were collected from indicated groups for A-D. Determination of TNF $\alpha$  (A) and IFN $\gamma$  (B) levels in sera were conducted by ELISA, according to manufacturer's instructions. Dashed lines represent the minimal detection dose, 1.88 pg/ml for TNF $\alpha$ , and 2 pg/ml for IFN $\gamma$ . Detection of full length C3 complement and its breakdown fragments of young (C) and aged (D) mice was analyzed by Western blot. Asterisks in D indicates presence of aberrant complement C3 and breakdown subunits in the aged female BC-*Cosmc*KO mice. Each symbol (black square and open circle for WT and BC-*Cosmc*KO mice, respectively) represents an individual mouse, graphed as mean  $\pm$  1 standard error of the mean (SEM). Sera were collected from age-matched aged (11-20 months old) and young (2-4 months old) mice of indicated gender. ns = not significant. Unpaired two-tailed Student's *t*-tests were performed to determine statistical significance with \* =  $p < 0.05$ , \*\* =  $p < 0.01$ .

### Fig. S4 Enhanced basal activation of *Cosmc*-deficient B cells.

(A) Expression levels of CD9 and CD1d on follicular B cells (B220<sup>+</sup> or CD19<sup>+</sup> CD23<sup>+</sup> CD21<sup>lo</sup> FOB, upper row) and marginal zone B cells (B220<sup>+</sup> or CD19<sup>+</sup> CD23<sup>lo</sup> CD21<sup>hi</sup> MZB, bottom row) by flow cytometry. Expression levels of CD86, CD80, and MHC II on (B) FOB cells and (C) MZ B cells. Splenocytes are prepared from both BC-*Cosmc*KO and WT littermate controls. The results are representative of three independent experiments with at least 3 animals in each group. Each symbol (black square and open circle for WT and BC-*Cosmc*KO mice, respectively) represents an individual mouse, graphed as mean  $\pm$  1 standard error of the mean (SEM). Cells were prepared from young (2-4 months old) male mice. Unpaired two-tailed Student's *t*-tests were performed to determine statistical significance with \* =  $p < 0.05$ , \*\* =  $p < 0.01$ , \*\*\* =  $p < 0.001$ .

### Fig. S5 *Cosmc* deficiency reduces PNA binding on germinal center B cells.

Binding analysis of biotinylated PNA, MAL-II, SNA, and Con A, followed by streptavidin-Alexa fluor 488, on neuraminidase or PBS treated WT and BC-*Cosmc*KO splenic B cell subsets (A): follicular B cells (B220<sup>+</sup> or CD19<sup>+</sup> CD23<sup>+</sup> CD21<sup>lo</sup> FOB, top two rows) marginal zone B cells (B220<sup>+</sup> or CD19<sup>+</sup> CD23<sup>lo</sup> CD21<sup>hi</sup> MZB, bottom two rows). (B) Representative histogram plots of PNA binding of splenic germinal center B cells (B220<sup>+</sup> or CD19<sup>+</sup> GL7<sup>+</sup> Fas<sup>+</sup>) and non-germinal center B cells (B220<sup>+</sup> or CD19<sup>+</sup> GL7<sup>-</sup> Fas<sup>-</sup>). Right, mean fluorescence intensity (MFI) of PNA binding on indicated B cell population is shown for each WT and BC-*Cosmc*KO mice. (C) Representative FACS plots of the germinal center B cell population in MLN simultaneously stained with CD19, GL7, Fas, and CD38, and analyzed by two gating strategies (CD19<sup>+</sup>GL7<sup>+</sup> Fas<sup>+</sup> left, and CD19<sup>+</sup>CD38<sup>lo</sup> Fas<sup>+</sup> middle). Right, percentage of GC B cells of total B cells shown for WT and BC-*Cosmc*KO mice of indicated tissue. Each symbol (black square and open circle for

WT and BC-*Cosmc*KO, respectively) represents an individual mouse, graphed as mean  $\pm$  1 standard error of the mean (SEM). Cells were prepared from young (2-4 months old) male mice in **A** and **B**, and from young male and female mice in **C**. Unpaired two-tailed Student's *t*-tests were performed to determine statistical significance with \*\* =  $p < 0.01$ , \*\*\* =  $p < 0.001$ . ns = not significant.

**Fig. S6 Antigen specific Immune responses in BC-*Cosmc*KO mice.**

NP-specific immunoglobulin responses to immunization with **(A)** NP-LPS, **(B)** NP-Ficoll. **(A)** Both WT (n=9) and BC-*Cosmc*KO mice (n=11) were intraperitoneally immunized with NP-LPS. **(B)** Both WT (n=9) and BC-*Cosmc*KO mice (n=9) were intraperitoneally immunized with NP-Ficoll. ELISA determined the titers of NP-specific IgM **(A and B)** of sera collected from immunized mice at indicated time points. Data were from two experiments with similar results. **(C)** Phospho-flow cytometry analysis of WT and BC-*Cosmc*KO B cells stimulated with anti-IgM antibody for indicated periods of time. Representative histogram plots of phosphorylated SYK and total cellular proteins (pan-tyrosine) shown. Each symbol (black square and open circle for WT and BC-*Cosmc*KO, respectively) represents an individual mouse, graphed as mean  $\pm$  1 standard error of the mean (SEM). Young (2-4 months old) male mice were used in **A-C**. Unpaired two-tailed Student's *t*-tests were performed to determine statistical significance with \*\* =  $p < 0.01$ .

# Supplementary Figures

fig. S1

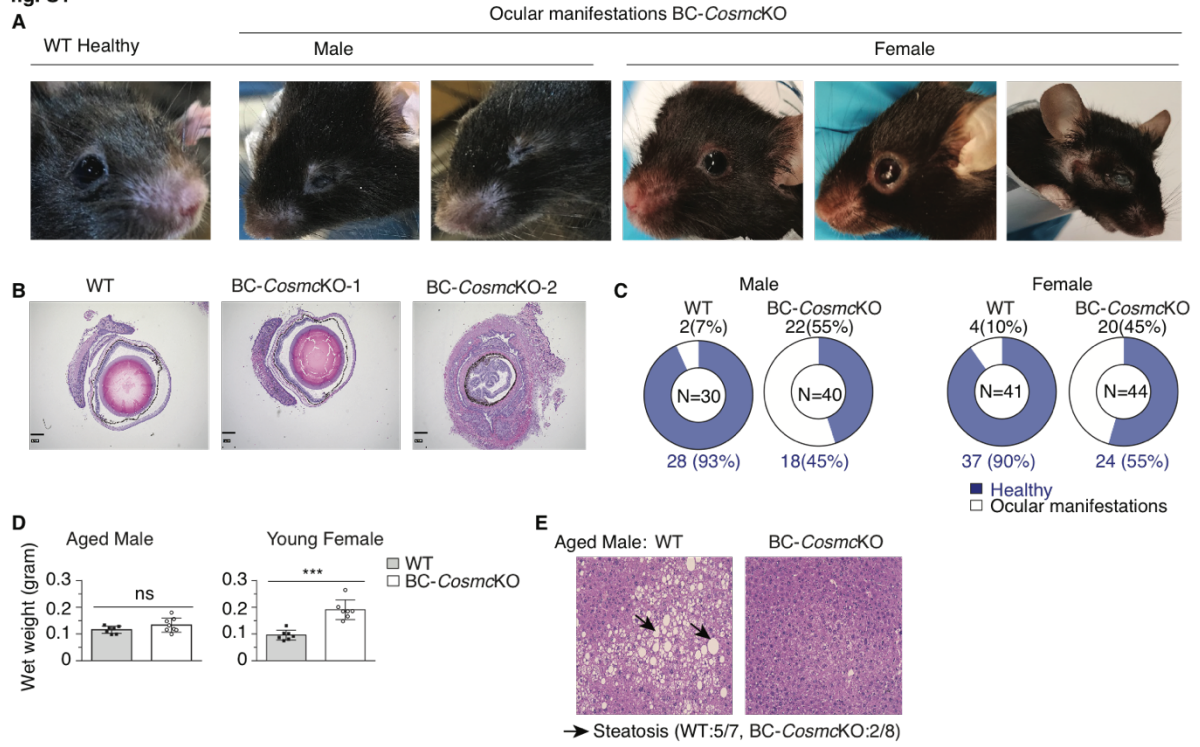

fig. S2

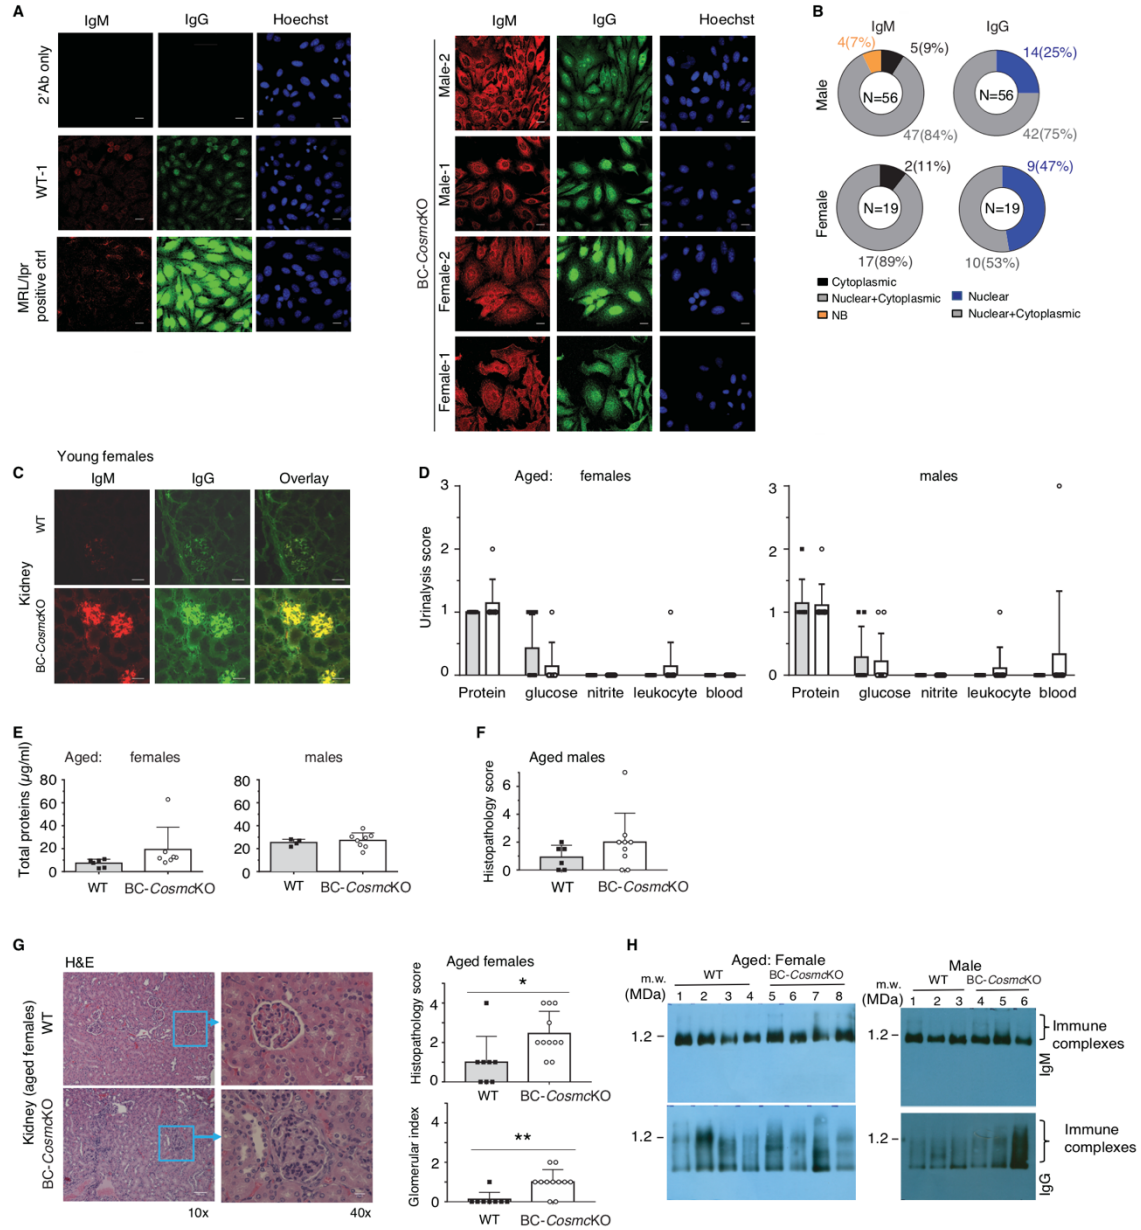

**fig. S3**

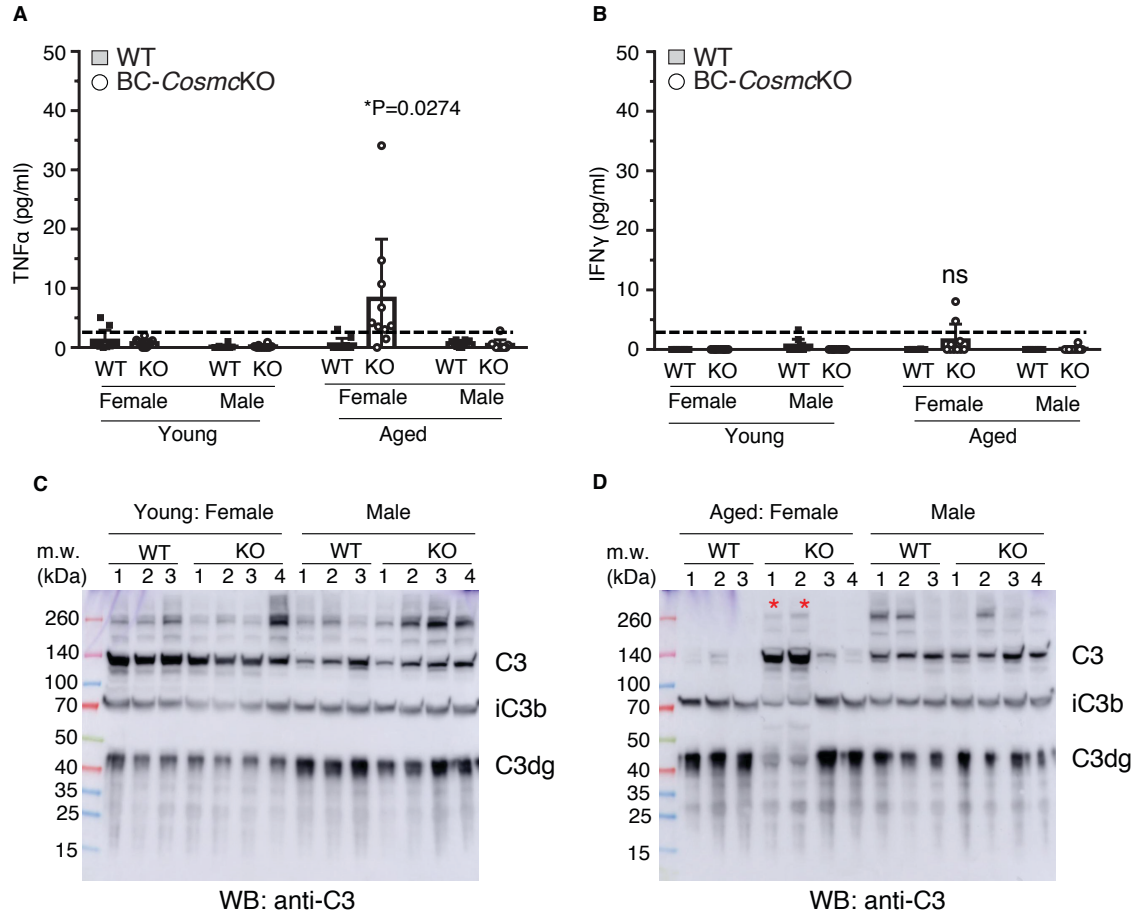

fig. S4

**A**

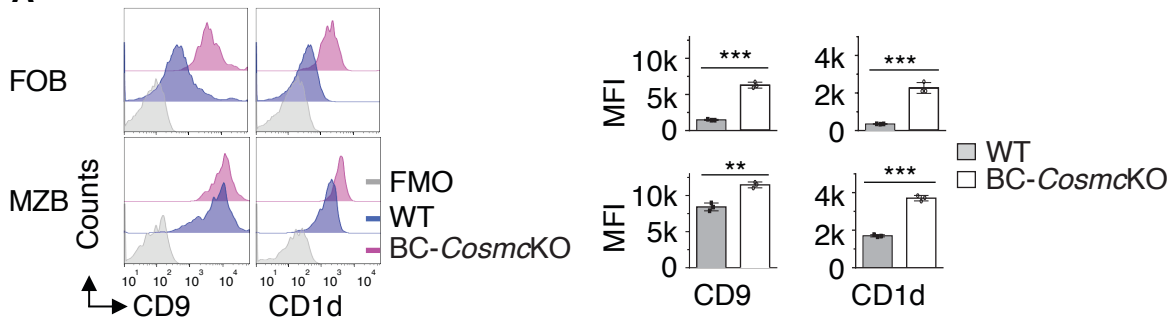

**B**

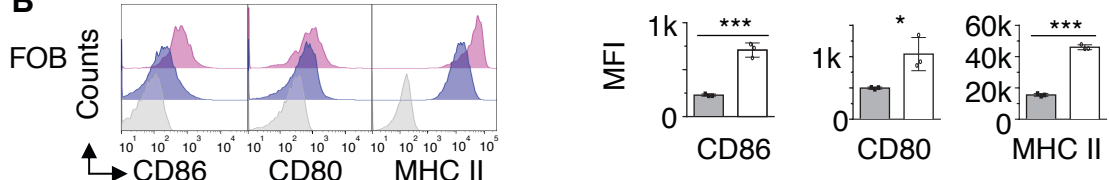

**C**

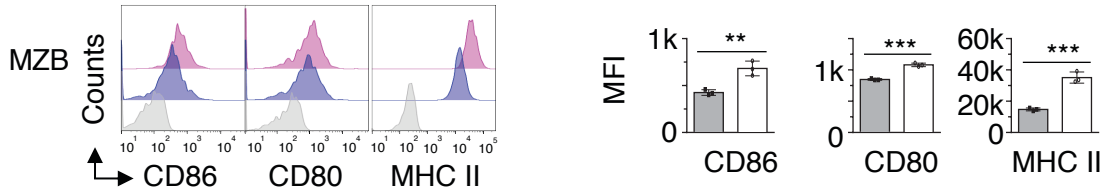



**fig. S5**

**A**

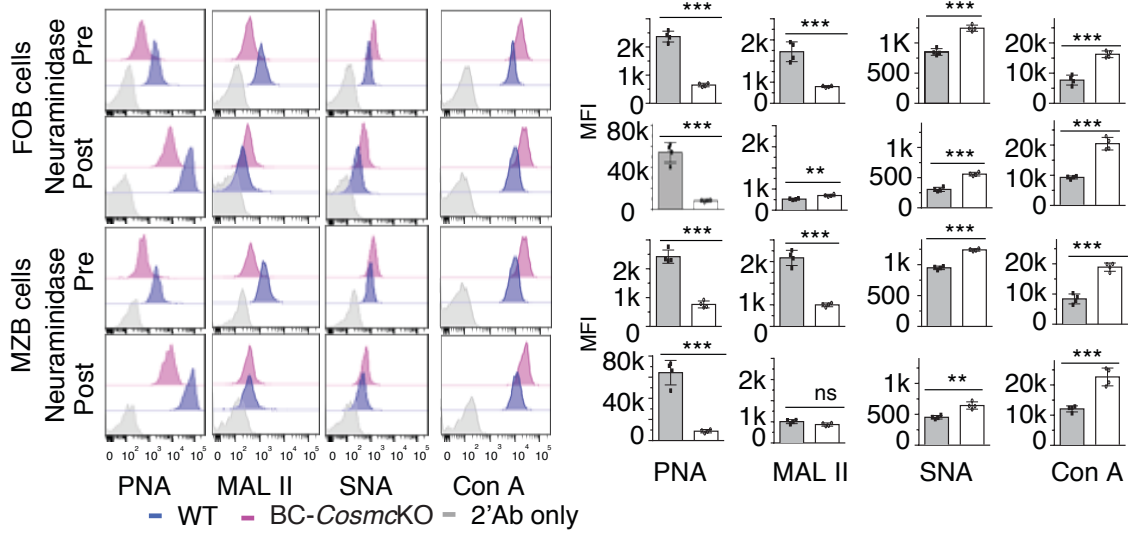

**B**

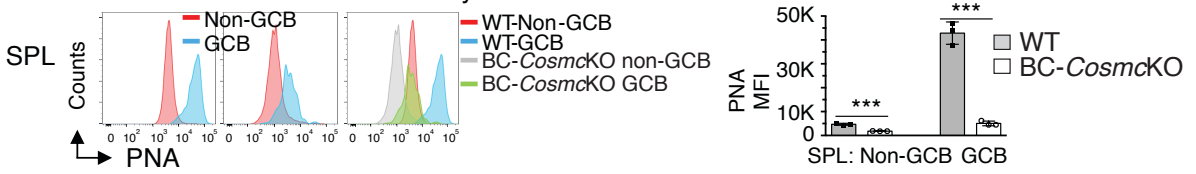

**C**

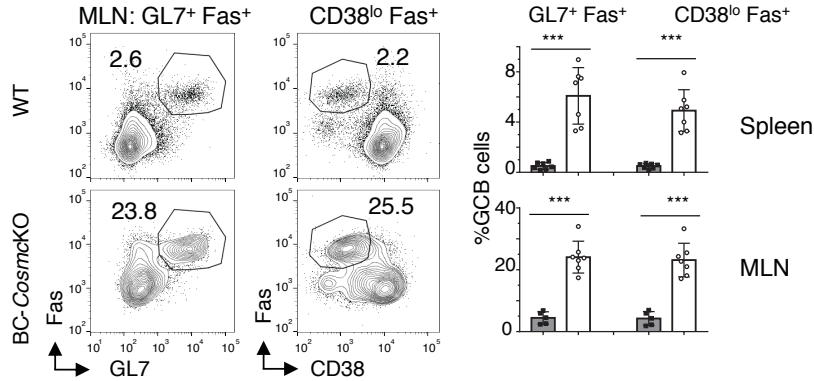

fig. S6

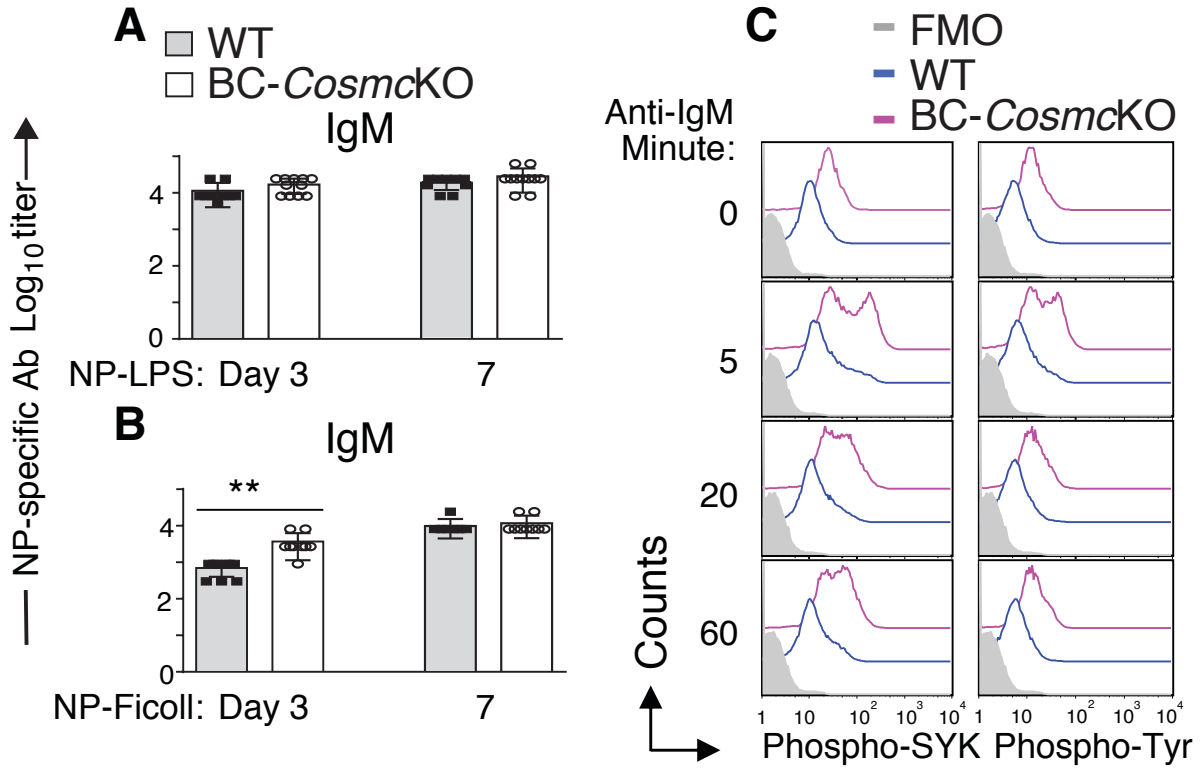

Supplement: sciadv.abg9118_sm.pdf [file sciadv.abg9118_sm.pdf]
